# Supplementary material for: QTL and Transcriptomic Analyses Implicate Cuticle Transcription Factor SHINE as a Source of Natural Variation for Epidermal Traits in Cucumber Fruit
Source: PubMed Central journal article supplement (PMC6890859; doi:10.3389/fpls.2019.01536), 2019-11-27
Supplement: Image_1.pdf [file Image_1.pdf]

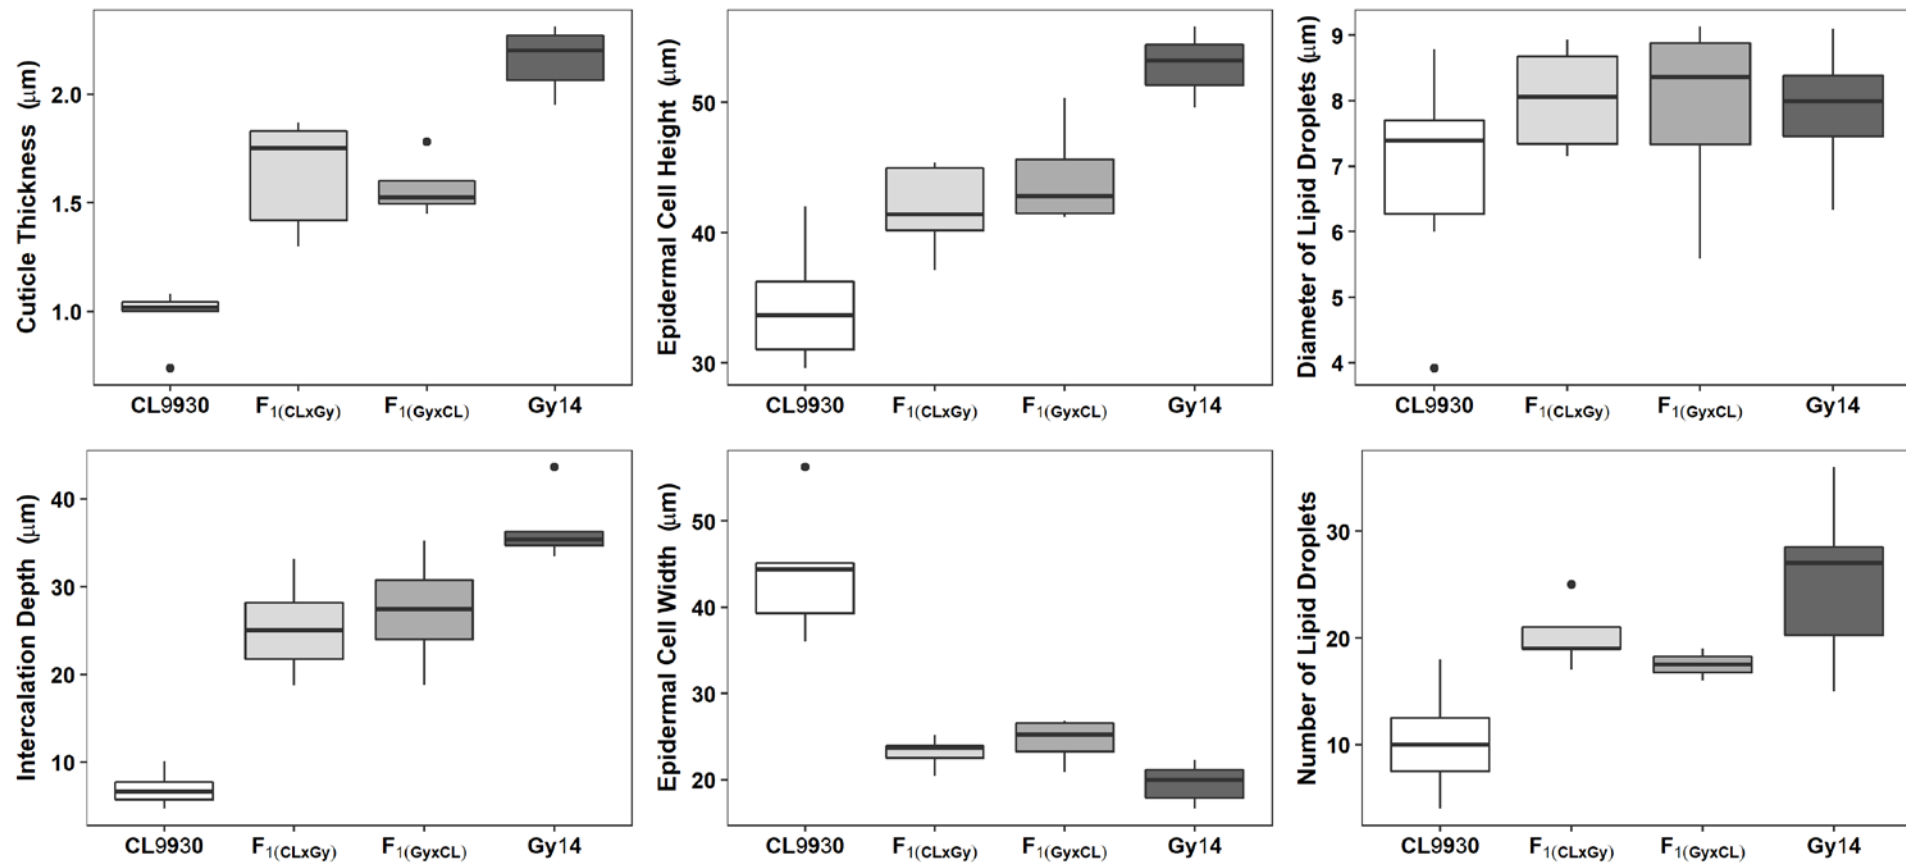

Supplementary Figure 1. Epidermal cell trait phenotypes for parents, Gy14, CL9930 and their reciprocal F<sub>1</sub> hybrids (Gy14 x CL9930) and (CL9930 x Gy14).
