# Supplementary material for: QTL and Transcriptomic Analyses Implicate Cuticle Transcription Factor SHINE as a Source of Natural Variation for Epidermal Traits in Cucumber Fruit
Source: Front Plant Sci. 2019 Nov 27;10:1536. doi: 10.3389/fpls.2019.01536 (PMC6890859; doi:10.3389/fpls.2019.01536)
Supplement: Supplementary file 5 [file Table_4.xlsx]

## Sheet: Table
Supplementary Table 4. Cuucmber acessions used to determine SNP at position 16961026, CLv3. Data from Qi et al., 2013 (entries lines 4-75) and CucCAP core samples, unpublished (entries 76-164).
				"C" in Gy14 and "G" in CL
Sample	No. reads	A	T	C	G	Individual code	PI CGN#	Name	Botanical variety	Origin
SRR543203	19	0	0	19	0	CG0001	Ames 28156	LJ 90430	C.s. var. hardwickii	India
SRR543204	28	0	0	28	0	CG0002	PI 183967	11621	C.s. var. hardwickii	Meghalaya, India
SRR543205	16	0	0	16	0	CG0003	PI 215589	13598	C.s. var. hardwickii	Uttar Pradesh, India
SRR543207	15	0	0	15	0	CG0005	PI 504564	VIR 3147	C.s. var. hardwickii	India
SRR543208	14	0	0	14	0	CG0010	-	Hw 1	C.s. var. hardwickii	India
SRR543209	11	0	0	11	0	CG0011	-	Hw 2	C.s. var. hardwickii	India
SRR543211	20	0	0	20	0	CG0014	-	Hw 4	C.s. var. hardwickii	India
SRR543212	18	0	0	18	0	CG0015	-	Hw 5	C.s. var. hardwickii	India
SRR543213	11	0	0	11	0	CG0016	CUS 233	CUS 233	C.s. var. hardwickii	India
SRR543214	11	0	0	11	0	CG0017	CUS 155	CUS 155	C.s. var. hardwickii	India
SRR543215	22	0	0	22	0	CG0020	PI 214155	13488	C.s. var. hardwickii	Karnataka, India
SRR543216	15	0	0	0	15	CG1031	V05A0674	Bei Jing Xiao Ci	C.s. var. sativus	Beijing, China
SRR543217	15	0	0	0	15	CG1043	V05A1180	CM8537-1-2-1-1-0-1-1-1	C.s. var. sativus	Jilin, China
SRR543218	13	0	0	0	13	CG1071	V05A0334	Fu Song Ye San	C.s. var. sativus	Jilin, China
SRR543219	17	0	0	0	17	CG1077	V05A0339	Qing Pi Ba Cha	C.s. var. sativus	Jilin, China
SRR543222	12	0	0	0	12	CG1247	V05A0650	Huang Tie Wu Ci Gua	C.s. var. sativus	Shanxi, China
SRR543223	10	0	0	0	10	CG1292	V05A0920	He Cha Huang Gua	C.s. var. sativus	Hebei, China
SRR543224	10	0	0	0	10	CG1322	V05A1115	Qian Qi Li Huang Gua	C.s. var. sativus	Hebei, China
SRR543225	18	0	0	0	18	CG1373	V05A0985	Ye San Bai	C.s. var. sativus	Hebei, China
SRR543229	22	0	0	0	22	CG1697	V05A0546	Jia Huang Gua	C.s. var. sativus	Shandong, China
SRR543230	15	0	1	0	14	CG1778	V05A0522	Huang Gua	C.s. var. sativus	-
SRR543232	16	0	0	0	16	CG1876	CGN20243	Cus124/71	C.s. var. sativus	China
SRR543236	16	0	0	0	16	CG3076	PI 504563	Tsuda	C.s. var. sativus	Japan
SRR543237	16	0	0	2	14	CG3079	PI 532523	Sakata Natsusango	C.s. var. sativus	Japan
SRR543239	16	0	0	0	16	CG3087	PI 267942	Sekino No. 2 (Ochiai No.2)	C.s. var. sativus	Osaka, Japan
SRR543240	20	0	0	0	20	CG3127	CGN19828	-	C.s. var. sativus	Japan
SRR543242	14	0	0	0	14	CG4041	V05A0034	Da Ci Huang Gua	C.s. var. sativus	Sichuan, China
SRR543243	10	0	0	0	10	CG4081	V05A1427	Qiu Huang Gua	C.s. var. sativus	Guangdong, China
SRR543244	11	0	0	9	2	CG4182	V05A0291	Leng Lu Huang Gua	C.s. var. sativus	Hunan, China
SRR543252	15	0	0	15	0	CG5031	CGN20266	Hok	C.s. var. sativus	Netherlands
SRR543254	11	0	0	11	0	CG5232	PI 288995	Nemet Kigyo	C.s. var. sativus	Hungary
SRR543256	13	0	0	13	0	CG5278	CGN19677	M 5	C.s. var. sativus	Netherlands
SRR543257	11	0	0	11	0	CG5326	CGN20512	752	C.s. var. sativus	Netherlands
SRR543258	13	0	0	13	0	CG5420	CGN20515	Gy 3 (S4)	C.s. var. sativus	Poland
SRR543261	11	0	0	11	0	CG5539	PI 512596	A-C-3	C.s. var. sativus	Teruel, Spain
SRR543262	18	0	0	18	0	CG5670	PI 338236	Ames 1208	C.s. var. sativus	Kayseri, Turkey
SRR543263	10	0	0	4	6	CG5756	CGN21670	Klinsky Mestnyj	C.s. var. sativus	Union of Soviet Soc. Rep.
SRR543268	13	0	0	0	13	CG6508	Ames 21698	Puerta-Rico #6	C.s. var. sativus	Puerto Rico
SRR543269	13	0	0	13	0	CG6542	CGN19579	1972 B-2	C.s. var. sativus	United States
SRR543270	11	0	0	7	4	CG6562	CGN19655	SC 53-B (6)	C.s. var. sativus	United States
SRR543274	16	0	0	16	0	CG6601	CGN21627	Spartan Garden MSU-C7-63	C.s. var. sativus	United States
SRR543279	12	0	0	0	12	CG7086	CGN21684	WJR2930	C.s. var. sativus	Iraq
SRR543280	14	0	0	9	5	CG7110	PI 181752	9748	C.s. var. sativus	Syria
SRR543283	12	0	0	12	0	CG7744	PI 500361	Inyangu	C.s. var. sativus	Central, Zambia
SRR543284	14	0	0	14	0	CG7747	PI 500359	ZM 1065	C.s. var. sativus	Central, Zambia
SRR543285	19	0	0	19	0	CG7748	PI 500365	Chibimbi	C.s. var. sativus	Copperbelt, Zambia
SRR543286	14	0	0	14	0	CG8039	CGN23002	JL-14 Dhillon	C.s. var. sativus	India
SRR543287	12	0	0	12	0	CG8093	PI 605988	USM 411	C.s. var. sativus	Rajasthan, India
SRR543288	14	0	0	14	0	CG8094	PI 605991	USM 414	C.s. var. sativus	Rajasthan, India
SRR543289	15	0	0	15	0	CG8099	PI 175120	10382	C.s. var. sativus	India
SRR543290	22	0	0	3	19	CG8119	PI 504570	Small Green	C.s. var. sativus	India
SRR543292	16	0	0	16	0	CG8163	PI 606039	KSM 588	C.s. var. sativus	Madhya Pradesh, India
SRR543294	19	0	0	19	0	CG8198	PI 605957	USM 321	C.s. var. sativus	Rajasthan, India
SRR543295	16	0	0	16	0	CG8216	PI 173892	9779	C.s. var. sativus	Uttar Pradesh, India
SRR543296	12	0	0	12	0	CG8712	CGN20890	Ketimun Tjarang/Putih	C.s. var. sativus	Indonesia
SRR543297	15	0	0	15	0	CG8724	CGN20517	Yellow 1	C.s. var. sativus	Sri Lanka
SRR543299	19	0	0	19	0	CG9142	-	Ban Na Huang Gua 12	C.s. var. sativus	Yunnan, China
SRR543300	11	0	0	10	1	CG9143	-	Ban Na Huang Gua 13	C.s. var. sativus	Yunnan, China
SRR543301	12	0	0	12	0	CG9146	-	Ban Na Huang Gua 15	C.s. var. sativus	Yunnan, China
SRR543302	12	0	0	12	0	CG9153	-	Yuan Xing Huang Pi Huang Gua	C.s. var. sativus	Yunnan, China
SRR543303	22	0	0	22	0	CG9160	-	Bai Chang Yuan Huang Gua	C.s. var. sativus	Yunnan, China
SRR543304	16	0	0	16	0	CG9164	-	Yuan Bai Huang Gua	C.s. var. sativus	Yunnan, China
SRR543305	20	0	0	20	0	CG9165	-	Bai Pi Yuan Huang Gua	C.s. var. sativus	Yunnan, China
SRR543306	14	0	0	14	0	CG9169	-	Yuan Duan Huang Pi	C.s. var. sativus	Yunnan, China
SRR543309	15	0	0	15	0	CG9187	-	Ban Na Huang Gua 53	C.s. var. sativus	Yunnan, China
SRR543310	14	0	0	14	0	CG9191	-	Man Wa Yuan Zong Huang Di Huang Gua	C.s. var. sativus	Yunnan, China
SRR543311	15	0	0	15	0	CG9192	-	Man Wa Chang Huang Di Huang Gua	C.s. var. sativus	Yunnan, China
SRR543312	21	0	0	21	0	CG9197	-	Na Jing Di Huang Gua 1	C.s. var. sativus	Yunnan, China
SRR543313	17	0	0	17	0	CG9198	-	Na Jing Di Huang Gua 2	C.s. var. sativus	Yunnan, China
SRR543314	16	0	0	16	0	CG9199	-	Ben Di Di Huang Gua	C.s. var. sativus	Yunnan, China
SRR543315	27	0	0	27	0	CG9201	-	Yuan Zong Huang Di Huang Gua	C.s. var. sativus	Yunnan, China
SRR543316	14	0	0	14	0	CG9203	-	Di Huang Gua	C.s. var. sativus	Yunnan, China
Ames13333	18	0	0	18	0			Pepin	C.s. var. sativus	Spain
Langelang Giant	17	0	0	7	10			Langelang Giant	C.s. var. sativus	U.S.
Marketer	13	0	0	13	0			Marketer	C.s. var. sativus	U.S.
Marketmore97	16	0	0	16	0			Marketmore97	C.s. var. sativus	U.S.
Midget	15	0	0	15	0			NSL 28183	C.s. var. sativus	U.S.
Model	13	0	0	2	11			Model	C.s. var. sativus	U.S.
NSL106639	14	0	0	14	0			Yomaki	C.s. var. sativus	Japan
NSL182007	12	0	0	12	0			Sumter	C.s. var. sativus	U.S.
NSL26507	14	0	0	14	0			Pixie	C.s. var. sativus	U.S.
NSL5723	11	0	0	0	11			Puerto Rico 39	C.s. var. sativus	Puerto Rico
NSL6567	15	0	0	0	15			Black Diamond	C.s. var. sativus	U.S.
NSL82999	19	0	0	19	0			MSU 915	C.s. var. sativus	U.S.
Ohio MR-17	19	0	0	19	0			Ohio MR-17	C.s. var. sativus	U.S.
PI163216	12	1	0	11	0			8307	C.s. var. sativus	Pakistan
PI163223	15	0	0	15	0			Kakri	C.s. var. sativus	Pakistan
PI167223	13	0	0	13	0			Hiyar	C.s. var. sativus	Turkey
PI171613	14	0	0	14	0			7125	C.s. var. sativus	Turkey
PI174167	10	0	0	6	4			8288	C.s. var. sativus	Turkey
PI178888	17	0	0	10	7			9693	C.s. var. sativus	Turkey
PI179676	17	0	0	17	0			Kakri	C.s. var. sativus	India
PI205996	19	0	0	0	19			Vasteras Druv OE/45	C.s. var. sativus	Sweeden
PI209069	27	0	0	0	27			Ohio 31	C.s. var. sativus	U.S.
PI257487	13	0	0	0	13			Water cucumber	C.s. var. sativus	China
PI267742	16	0	0	0	16			Hong Kong NT	C.s. var. sativus	Hong Kong
PI267743	42	0	0	42	0			Chinese cucumber	C.s. var. sativus	Hong Kong
PI267746	14	0	0	0	14			Selection from PI 164816	C.s. var. sativus	India
PI271327	12	0	0	12	0			Khira	C.s. var. sativus	India
PI271328	17	0	0	17	0			Khira	C.s. var. sativus	India
PI271331	11	0	0	11	0			Khira	C.s. var. sativus	India
PI275410	29	0	0	29	0			Eminent Broei	C.s. var. sativus	Netherlands
PI277741	18	0	0	18	0			Green Spot Super	C.s. var. sativus	Netherlands
PI279464	22	0	0	0	22			Kaga Aonaga-fushinari	C.s. var. sativus	Japan
PI279466	23	0	0	0	23			Ochiai-fushinari, Strain I	C.s. var. sativus	Japan
PI292012	24	0	0	21	3			Hermaphrodite cucumber	C.s. var. sativus	Israel
PI296120	11	0	0	0	11				C.s. var. sativus	Egypt
PI306785	31	0	0	1	30			Armour	C.s. var. sativus	Canada
PI314425	13	0	0	0	13			Nejinske	C.s. var. sativus	Georgia
PI321006	10	0	0	1	9			Fengyuan Green Skin	C.s. var. sativus	Taiwan
PI344442	24	0	0	23	1			Shiraz	C.s. var. sativus	Iran
PI356809	30	0	0	0	30			HP61	C.s. var. sativus	Soviet Union
PI356832	10	0	0	10	0			Spotresisting	C.s. var. sativus	Netherlands
PI357867	13	0	0	0	13			Bitolska	C.s. var. sativus	Macedonia
PI358813	13	0	0	13	0				C.s. var. sativus	Malaysia
PI368553	23	0	0	23	0			Dolgi langi	C.s. var. sativus	Macedonia
PI370019	10	0	0	10	0			Cu 68-01	C.s. var. sativus	India
PI370643	17	0	0	17	0			1031	C.s. var. sativus	Russian Federation
PI390240	16	0	0	16	0			Ao Fushinari (B)	C.s. var. sativus	Japan
PI414159	14	0	0	14	0			Lehua No. 1	C.s. var. sativus	U.S.
PI418964	19	0	0	0	19			794	C.s. var. sativus	China
PI422180	18	0	0	6	12			Hyclos Mix	C.s. var. sativus	Netherlands
PI422182	25	0	0	25	0			Kobus Mix	C.s. var. sativus	Netherlands
PI426169	16	0	0	16	0			UPL-Cu-1	C.s. var. sativus	Philippines
PI432855	10	0	0	10	0			314 F1	C.s. var. sativus	China
PI432865	13	0	0	0	13			Kuan chi chiao pai hasia chiu No. 1	C.s. var. sativus	Japan
PI432869	11	0	0	0	11			Shanghai	C.s. var. sativus	China
PI432882	11	0	0	0	11			San dong si gua	C.s. var. sativus	China
PI435947	29	0	0	29	0			Parad	C.s. var. sativus	Soviet Union
PI451975	14	0	0	6	8			Ottawa 41	C.s. var. sativus	Canada
PI466922	18	0	0	18	0			M-2C	C.s. var. sativus	Russian Federation
PI481612	26	0	0	0	26			Kenchu	C.s. var. sativus	Bhutan
PI481614	28	0	0	28	0			Gagon	C.s. var. sativus	Bhutan
PI481617	11	0	0	0	11			457	C.s. var. sativus	Bhutan
PI482464	23	0	0	0	23			TGR 1785	C.s. var. sativus	Zinbabwe
PI483340	14	0	0	2	12			H. N. Semiwhite F1	C.s. var. sativus	South Korea
PI500360	11	0	0	11	0			Chibimbi	C.s. var. sativus	Zambia
PI531313	19	1	0	18	0			Kecskemeti Livme	C.s. var. sativus	Hungary
PI605930	24	0	0	24	0			USM 265	C.s. var. sativus	India
PI605933	21	0	0	21	0			USM 268	C.s. var. sativus	India
PI605957	16	0	0	16	0			USM 321	C.s. var. sativus	India
PI605981	12	0	0	12	0			USM 359	C.s. var. sativus	India
PI605998	33	0	0	33	0			KSM 443	C.s. var. sativus	India
Poinsett76	14	0	0	14	0			Poinsette	C.s. var. sativus	U.S.
V05A1115	16	0	0	0	16			V05A1115	C.s. var. sativus	China
WI7004	11	0	0	11	0			WI7004	C.s. var. sativus	U.S.
WI7155A	26	0	0	26	0			WI7155A	C.s. var. sativus	U.S.
WI7155B	10	0	0	10	0			WI7155B	C.s. var. sativus	U.S.
WI7232	17	0	0	17	0			WI7232	C.s. var. sativus	USDA
WI7581	15	0	0	15	0			WI7581	C.s. var. sativus	China
WI7631	10	0	0	6	4			WI7631	C.s. var. sativus	China
WI7721	41	0	0	0	41			H62	C.s. var. sativus	US
WI7722	16	0	0	16	0			G52	C.s. var. sativus	USDA
WI7723	16	0	0	16	0			SLR0101	C.s. var. sativus	USDA
WI7724	28	0	0	28	0			SLR003	C.s. var. sativus	USDA
WI7725	16	0	0	16	0			SLR06	C.s. var. sativus	USDA
WI7726	29	0	0	29	0			PKL03	C.s. var. sativus	USDA
WI7727	18	0	0	18	0			BAT07	C.s. var. sativus	USDA
WI7728	13	0	0	13	0			LET03	C.s. var. sativus	USDA
WI7729	14	0	0	0	14			CAP13	C.s. var. sativus	USDA
